# Supplementary material for: Comparison of different mass bias correction procedures for the measurement of mercury species-specific isotopic composition by gas chromatography coupled to multicollector ICP-MS
Source: Royal Society of Chemistry journal article supplement (doi:10.1039/d3ja00356f), 2023-12-13
Supplement: d3ja00356f1.pdf [file d3ja00356f1.pdf]

## **ELECTRONIC SUPPLEMENTARY INFORMATION**

### **COMPARISON OF DIFFERENT MASS BIAS CORRECTION PROCEDURES FOR THE MEASUREMENT OF MERCURY SPECIES-SPECIFIC ISOTOPIC COMPOSITION BY GAS CHROMATOGRAPHY COUPLED TO MULTICOLLECTOR ICP-MS**

Laura Suárez-Criado, Silvia Queipo-Abad, Pablo Rodríguez-González\*, José Ignacio García Alonso

Department of Physical and Analytical Chemistry, University of Oviedo, Julián Clavería, 8, 33006-Oviedo (Spain)

\*Author for correspondence: [rodriguezpablo@uniovi.es](mailto:rodriguezpablo@uniovi.es)

**Number of pages: 8**

**Number of Tables: 4**

**Number of Figures: 3**

**Table S1.** GC-MC-ICP-MS operating conditions.

| <b>GC</b>                  | <b>Agilent 6890</b>                                                                                                                                                                  |
|----------------------------|--------------------------------------------------------------------------------------------------------------------------------------------------------------------------------------|
| Column                     | DB-5MS (5% diphenyl, 95% dimethylsiloxane, 30 m x 0.53 mm i.d. x 1µm)                                                                                                                |
| Carrier gas                | He                                                                                                                                                                                   |
| Injector temperature       | 250 °C                                                                                                                                                                               |
| Volume of injection        | 2 µL                                                                                                                                                                                 |
| Injector purge time        | 1 min                                                                                                                                                                                |
| GC-ICP-MS Interface T      | 270 °C                                                                                                                                                                               |
| Initial temperature        | 60 °C                                                                                                                                                                                |
| Initial time               | 1 min                                                                                                                                                                                |
| Ramp                       | 40 °C/min                                                                                                                                                                            |
| Final temperature          | 250 °C                                                                                                                                                                               |
| Final time                 | 1 min                                                                                                                                                                                |
| Total analysis time        | 6.8 min                                                                                                                                                                              |
| <b>MC-ICP-MS</b>           | <b>Neptune Plus (Thermo Scientific)</b>                                                                                                                                              |
| RF power                   | 1200 W                                                                                                                                                                               |
| Resolution mode            | Medium                                                                                                                                                                               |
| Integration times          | 0.132 s                                                                                                                                                                              |
| Cycles/Blocks              | 2500                                                                                                                                                                                 |
| Sample Ar gas flow         | 0.7 L/min                                                                                                                                                                            |
| Nebulization Ar gas flow   | 0.5 L/min                                                                                                                                                                            |
| Cooling Ar gas flow        | 15.2 L/min                                                                                                                                                                           |
| Auxiliary Ar gas flow      | 0.8 L/min                                                                                                                                                                            |
| Faraday Cups configuration | L4, L3 ( <sup>198</sup> Hg), L2 ( <sup>199</sup> Hg), L1 ( <sup>200</sup> Hg), C ( <sup>201</sup> Hg), H1 ( <sup>202</sup> Hg), H2 ( <sup>203</sup> Tl), H3 ( <sup>205</sup> Tl), H4 |

**Figure S1.** Schematic analytical setup of the GC-MC-ICPMS used in this work for the measurement of compound-specific Hg isotope ratios.

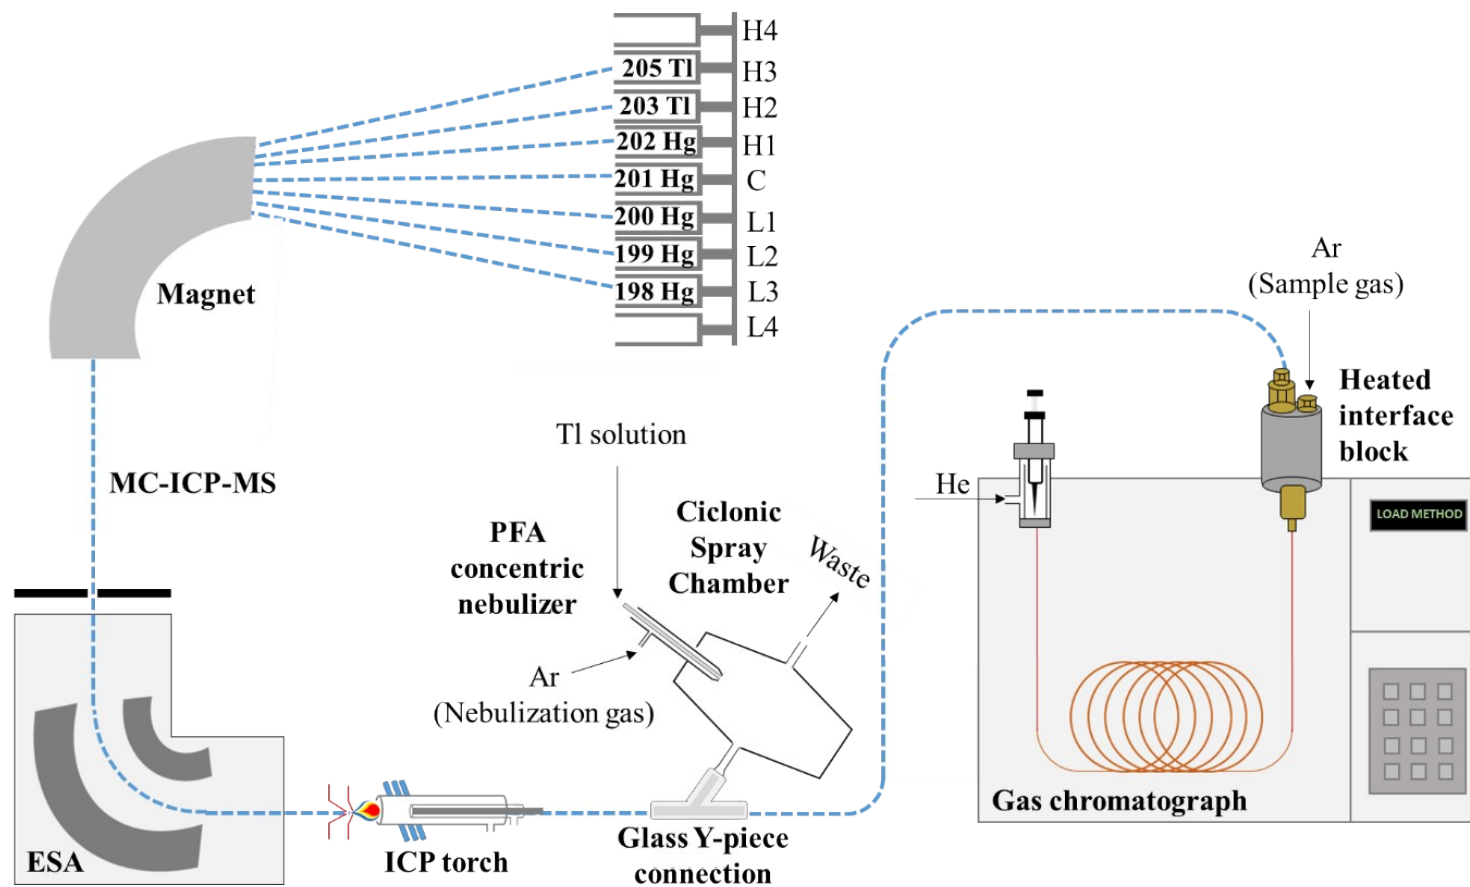

**Figure S2.** Process for the determination of mercury and thallium isotope ratios. 1) Signal profile for  $^{198}\text{Hg}$  and  $^{202}\text{Hg}$  for 321 consecutive data points (signal for  $^{202}\text{Hg}$  shifted for clarity). 2) Measurement of the isotope ratio from the slope of the linear plot. 3) Correction for time-lag at  $^{202}\text{Hg}$  and final isotope ratio. 4) Signal profile for  $^{203}\text{Tl}$  and  $^{205}\text{Tl}$  for 321 consecutive data points. 5) Calculation of the  $^{205}\text{Tl}/^{203}\text{Tl}$  isotope ratio. 6) Determination of the residuals for thallium to check for mass bias alterations during the elution of the mercury peak.

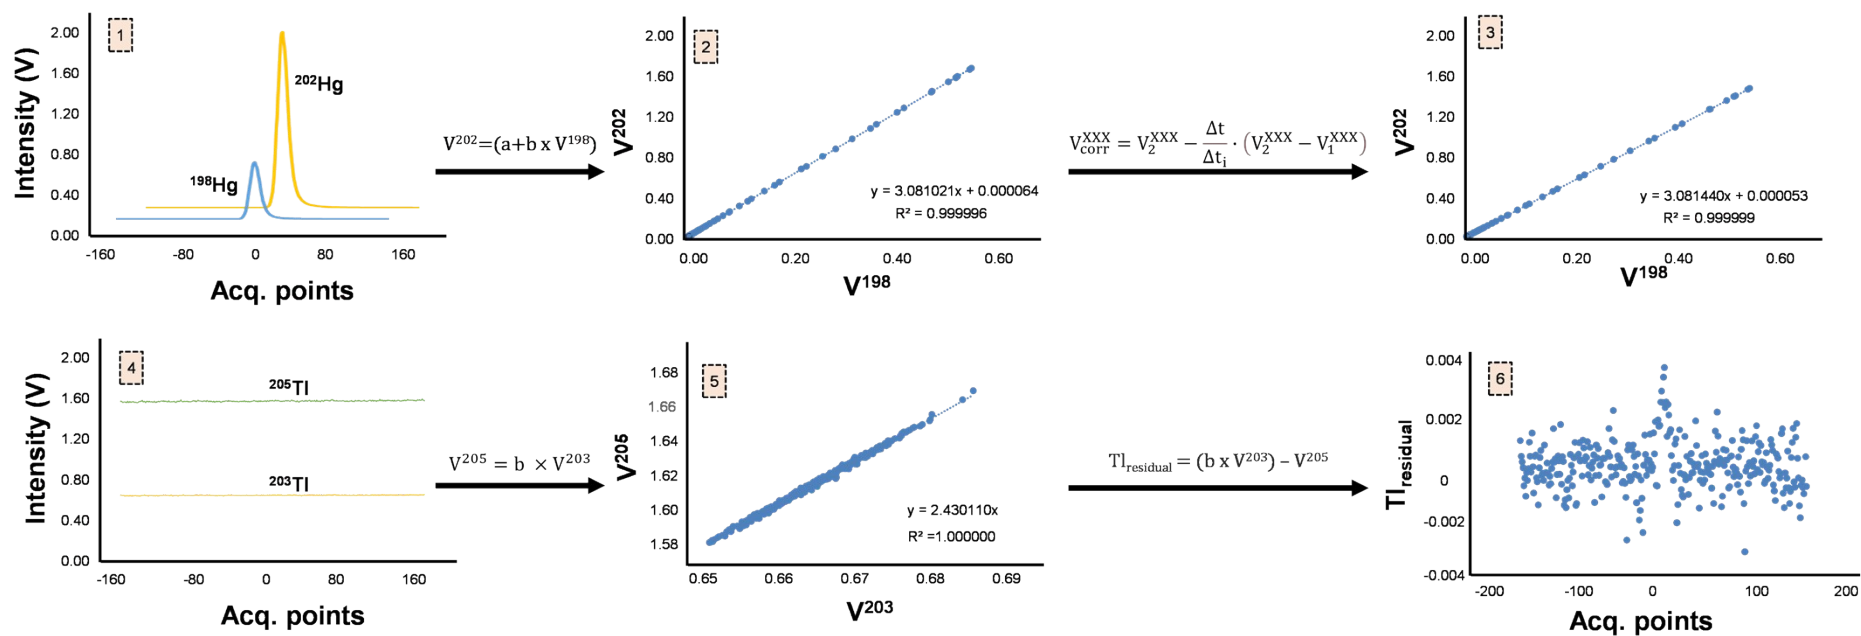

**Figure S3.**  $\delta$ -values calculation. a) SSB and b) Baxter delta calculation model.

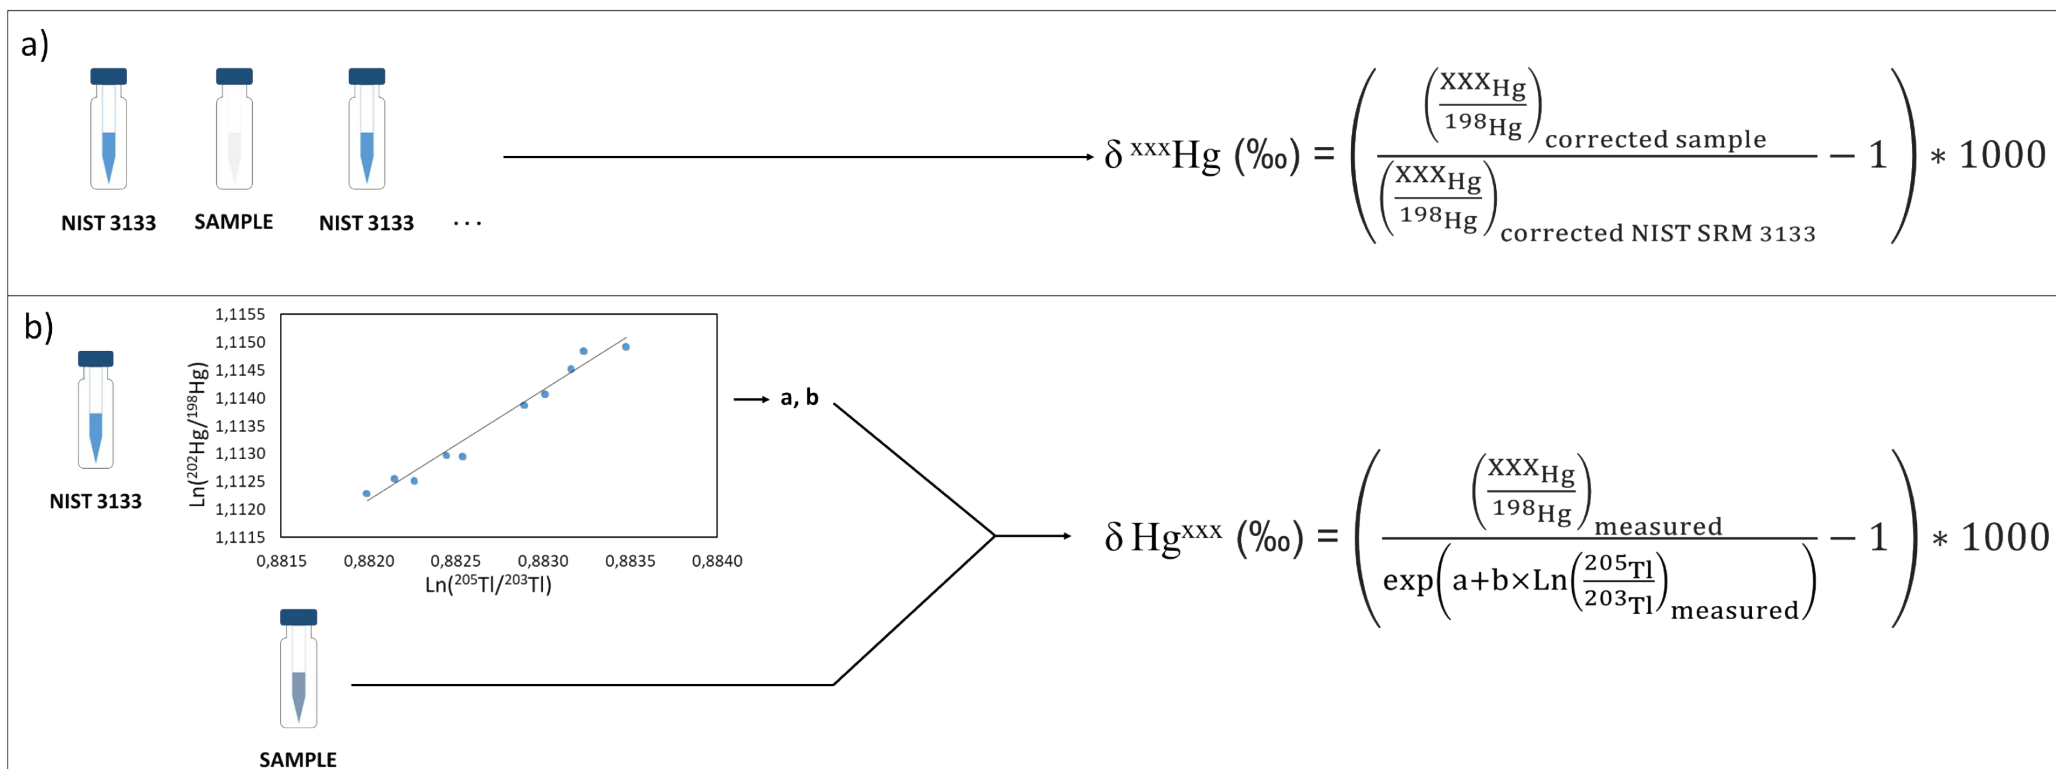

**Table S2.** Average NIST RM 8610 IR values and the internal precision expressed as  $\pm 2SE$  calculated with Russell and Baxter for three independent measurement sessions with three different mass bias correction approaches: 1) 321 acquisition points of TI, 2) 27 acquisition points of TI and 3) point by point (Pbp).

| Mass Bias Correction Model                                        |                       | Russell             |                     |                     | Baxter              |                     |
|-------------------------------------------------------------------|-----------------------|---------------------|---------------------|---------------------|---------------------|---------------------|
| Mass bias calculation procedure with TI                           |                       | LRS-321 TI          | LRS-27 TI           | PbP – 321 TI        | LRS-321 TI          | LRS-27 TI           |
| <b>Session 1</b><br><b>NIST</b><br><b>RM 8610</b><br><b>(n=8)</b> | $^{199/198}\text{Hg}$ | $1.6871 \pm 0.0005$ | $1.6870 \pm 0.0007$ | $1.6869 \pm 0.0008$ | $1.6871 \pm 0.0002$ | $1.6871 \pm 0.0003$ |
|                                                                   | $^{200/198}\text{Hg}$ | $2.3042 \pm 0.0008$ | $2.3040 \pm 0.0011$ | $2.3037 \pm 0.0014$ | $2.3042 \pm 0.0005$ | $2.3042 \pm 0.0005$ |
|                                                                   | $^{201/198}\text{Hg}$ | $1.3114 \pm 0.0005$ | $1.3112 \pm 0.0008$ | $1.3109 \pm 0.0013$ | $1.3114 \pm 0.0003$ | $1.3111 \pm 0.0005$ |
|                                                                   | $^{202/198}\text{Hg}$ | $2.9611 \pm 0.0008$ | $2.9605 \pm 0.0018$ | $2.9597 \pm 0.0033$ | $2.9611 \pm 0.0003$ | $2.9608 \pm 0.0009$ |
| <b>Session 2</b><br><b>NIST</b><br><b>RM 8610</b><br><b>(n=8)</b> | $^{199/198}\text{Hg}$ | $1.6868 \pm 0.0005$ | $1.6869 \pm 0.0005$ | $1.6868 \pm 0.0006$ | $1.6868 \pm 0.0002$ | $1.6869 \pm 0.0002$ |
|                                                                   | $^{200/198}\text{Hg}$ | $2.3044 \pm 0.0008$ | $2.3045 \pm 0.0012$ | $2.3045 \pm 0.0006$ | $2.3044 \pm 0.0003$ | $2.3045 \pm 0.0004$ |
|                                                                   | $^{201/198}\text{Hg}$ | $1.3114 \pm 0.0003$ | $1.3115 \pm 0.0006$ | $1.3115 \pm 0.0015$ | $1.3114 \pm 0.0001$ | $1.3116 \pm 0.0002$ |
|                                                                   | $^{202/198}\text{Hg}$ | $2.9610 \pm 0.0006$ | $2.9613 \pm 0.0015$ | $2.9613 \pm 0.0027$ | $2.9610 \pm 0.0002$ | $2.9613 \pm 0.0005$ |
| <b>Session 3</b><br><b>NIST</b><br><b>RM 8610</b><br><b>(n=8)</b> | $^{199/198}\text{Hg}$ | $1.6871 \pm 0.0008$ | $1.6871 \pm 0.0007$ | $1.6871 \pm 0.0007$ | $1.6871 \pm 0.0003$ | $1.6871 \pm 0.0003$ |
|                                                                   | $^{200/198}\text{Hg}$ | $2.3044 \pm 0.0010$ | $2.3044 \pm 0.0009$ | $2.3043 \pm 0.0012$ | $2.3045 \pm 0.0004$ | $2.3044 \pm 0.0003$ |
|                                                                   | $^{201/198}\text{Hg}$ | $1.3114 \pm 0.0005$ | $1.3114 \pm 0.0006$ | $1.3113 \pm 0.0012$ | $1.3115 \pm 0.0002$ | $1.3115 \pm 0.0002$ |
|                                                                   | $^{202/198}\text{Hg}$ | $2.9612 \pm 0.0014$ | $2.9611 \pm 0.0013$ | $2.9608 \pm 0.0032$ | $2.9613 \pm 0.0004$ | $2.9611 \pm 0.0005$ |

**Table S3.** Average Hg(II)-NIST 3133  $\delta_{\text{zero}}$  (‰) and external precisions expressed as  $\pm 2\text{SD}$  calculated with SSB and Baxter for three independent measurement sessions with three different mass bias correction calculation methods: 1) LRS for 321 acquisition points of Tl, 2) LRS for 27 acquisition points of Tl and 3) PbP approach.

| Delta values calculation strategy       |                         | SSB             |                 |                 | Baxter          |                  |
|-----------------------------------------|-------------------------|-----------------|-----------------|-----------------|-----------------|------------------|
| Mass Bias Correction Model              |                         | Russell         | Russel          | Russel          | Baxter          | Baxter           |
| Mass bias calculation procedure with Tl |                         | LRS-321 Tl      | LRS-27 Tl       | PbP – 321 Tl    | LRS-321 Tl      | LRS-27 Tl        |
| NIST 3133<br>(n=26)                     | $\delta^{202}\text{Hg}$ | 0.07 $\pm$ 0.41 | 0.11 $\pm$ 0.70 | 0.14 $\pm$ 1.26 | 0.06 $\pm$ 0.46 | -0.29 $\pm$ 1.94 |
|                                         | $\delta^{201}\text{Hg}$ | 0.06 $\pm$ 0.47 | 0.08 $\pm$ 0.69 | 0.11 $\pm$ 1.00 | 0.00 $\pm$ 0.59 | -0.13 $\pm$ 0.97 |
|                                         | $\delta^{200}\text{Hg}$ | 0.02 $\pm$ 0.43 | 0.03 $\pm$ 0.50 | 0.05 $\pm$ 0.77 | 0.00 $\pm$ 0.50 | -0.15 $\pm$ 1.16 |
|                                         | $\delta^{199}\text{Hg}$ | 0.02 $\pm$ 0.34 | 0.03 $\pm$ 0.33 | 0.03 $\pm$ 0.42 | 0.01 $\pm$ 0.35 | -0.14 $\pm$ 0.87 |

**Table S4.** Average  $\delta^{xxx}$  Hg(II) NIST RM 8610 (‰) and external precisions expressed as  $\pm 2SD$  calculated with SSB and Baxter for three independent measurement sessions with three different mass bias correction calculation methods: 1) LRS for 321 acquisition points of Tl, 2) LRS for 27 acquisition points of Tl and 3) PbP approach.

| Delta values calculation strategy       |                   | SSB              |                  |                  | Baxter           |                  | Reference values |
|-----------------------------------------|-------------------|------------------|------------------|------------------|------------------|------------------|------------------|
| Mass Bias Correction Model              |                   | Russell          | Russel           | Russel           | Baxter           | Baxter           |                  |
| Mass bias calculation procedure with Tl |                   | LRS-321 Tl       | LRS-27 Tl        | PbP – 321 Tl     | LRS-321 Tl       | LRS-27 Tl        |                  |
| NIST RM 8610<br>(n=24)                  | $\delta^{202}$ Hg | $-0.59 \pm 0.34$ | $-0.61 \pm 0.40$ | $-0.77 \pm 1.09$ | $-0.60 \pm 0.31$ | $-0.60 \pm 0.57$ | $-0.56 \pm 0.03$ |
|                                         | $\delta^{201}$ Hg | $-0.44 \pm 0.35$ | $-0.46 \pm 0.46$ | $-0.58 \pm 0.92$ | $-0.44 \pm 0.44$ | $-0.46 \pm 0.74$ | $-0.46 \pm 0.02$ |
|                                         | $\delta^{200}$ Hg | $-0.27 \pm 0.38$ | $-0.28 \pm 0.44$ | $-0.36 \pm 0.65$ | $-0.27 \pm 0.44$ | $-0.25 \pm 0.46$ | $-0.27 \pm 0.01$ |
|                                         | $\delta^{199}$ Hg | $-0.16 \pm 0.40$ | $-0.17 \pm 0.38$ | $-0.21 \pm 0.43$ | $-0.17 \pm 0.44$ | $-0.16 \pm 0.45$ | $-0.17 \pm 0.01$ |
